# Supplementary material for: Maternal diabetes-mediated RORA suppression in mice contributes to autism-like offspring through inhibition of aromatase
Source: PubMed Central journal article supplement (PMC8758718; doi:10.1038/s42003-022-03005-8), 2022-01-13
Supplement: 42003_2022_3005_MOESM2_ESM.pdf [file 42003_2022_3005_MOESM2_ESM.pdf]

## Description of Additional Supplementary Files

**File name:** Supplementary Data 1

**Description:** In vitro cell culture study except Fig 1a and 1b.

**File name:** Supplementary Data 2

**Description:** In vitro cell culture study for Fig 1a and 1b.

**File name:** Supplementary Data 3

**Description:** In vitro cell culture study for mapping of RORA/CYP19A11 regulation elements.

**File name:** Supplementary Data 4

**Description:** In vivo mouse study.

**File name:** Supplementary Data 5

**Description:** In vivo human study.
